# Supplementary material for: Tryptophan prenyltransferases showing higher catalytic activities for Friedel–Crafts alkylation of o- and m-tyrosines than tyrosine prenyltransferases
Source: Royal Society of Chemistry journal article supplement (doi:10.1039/c5ob01040c), 2015-01-01
Supplement: c5ob01040c1.pdf [file c5ob01040c1.pdf]

**Electronic Supplementary Information for**

**Tryptophan prenyltransferases showing higher catalytic activities for Friedel-Crafts alkylation of *o*-  
and *m*-tyrosine than tyrosine prenyltransferases**

Aili Fan<sup>a</sup>, Xiulan Xie<sup>b</sup> and Shu-Ming Li<sup>a\*</sup>

<sup>a</sup>Institut für Pharmazeutische Biologie und Biotechnologie, Philipps Universität Marburg, Deutschhausstrasse 17a,  
35037 Marburg, Germany

<sup>b</sup>Fachbereich Chemie, Philipps Universität Marburg, Hans-Meerwein-Strasse, 35032 Marburg, Germany

\*corresponding to: [shuming.li@staff.uni-marburg.de](mailto:shuming.li@staff.uni-marburg.de); tel: 0049-64212822461; fax: 0049-64212825365

## Content

|                                                                                                  |   |
|--------------------------------------------------------------------------------------------------|---|
| <b>Fig. S1.</b> $^1\text{H-NMR}$ spectrum of <b>3b</b> in $\text{MeOH-d}_4$ .....                | 3 |
| <b>Fig. S2.</b> $^1\text{H-NMR}$ spectrum of <b>4b</b> in $\text{MeOH-d}_4$ .....                | 3 |
| <b>Fig. S3.</b> HSQC spectrum of <b>4b</b> in $\text{MeOH-d}_4$ .....                            | 4 |
| <b>Fig. S4.</b> HMBC spectrum of <b>4b</b> in $\text{MeOH-d}_4$ .....                            | 4 |
| <b>Fig. S5.</b> $^1\text{H-NMR}$ spectrum of <b>4c</b> in $\text{MeOH-d}_4$ .....                | 5 |
| <b>Fig. S6.</b> Determination of kinetic parameters of FgaPT2 for <b>3a</b> .....                | 6 |
| <b>Fig. S7.</b> Determination of kinetic parameters of 5-DMATS for <b>3a</b> .....               | 6 |
| <b>Fig. S8.</b> Determination of kinetic parameters of 6-DMATS <sub>Sv</sub> for <b>3a</b> ..... | 7 |
| <b>Fig. S9.</b> Determination of kinetic parameters of 7-DMATS for <b>3a</b> .....               | 7 |
| <b>Fig. S10.</b> Determination of kinetic parameters of TyrPT for <b>3a</b> .....                | 8 |
| <b>Fig. S11.</b> Determination of kinetic parameters of FgaPT2 for <b>4a</b> .....               | 8 |

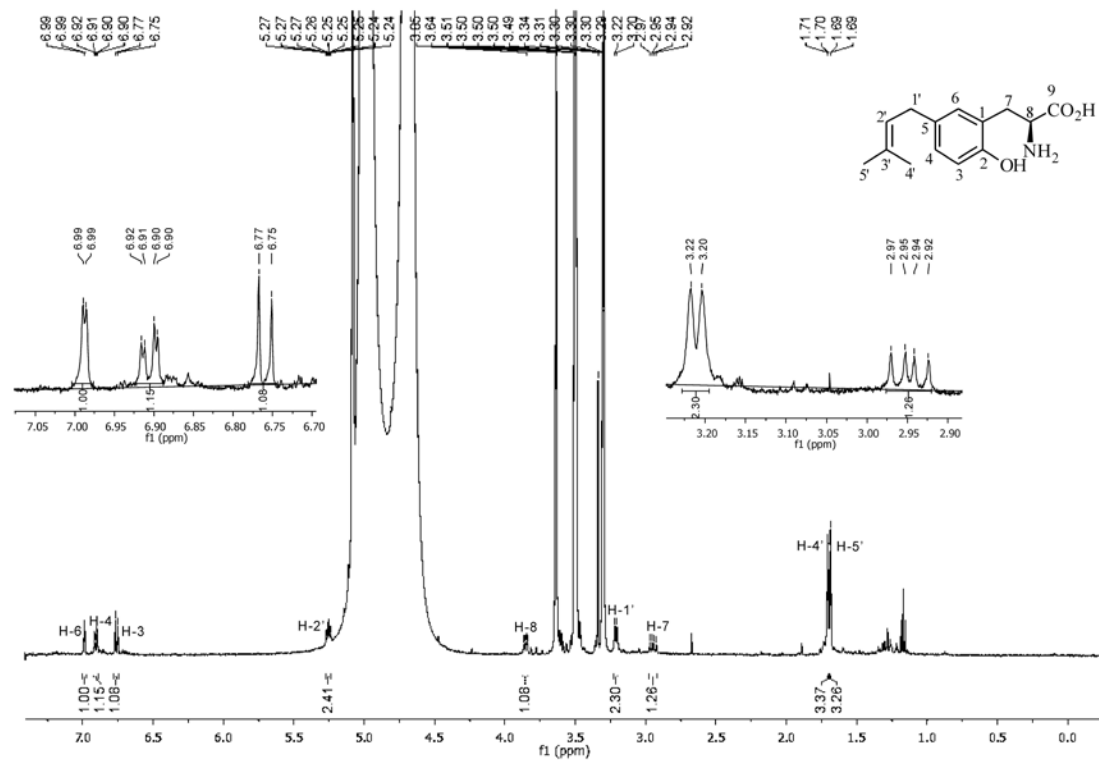

Fig. S1. <sup>1</sup>H-NMR spectrum of **3b** in MeOH-d<sub>4</sub>.

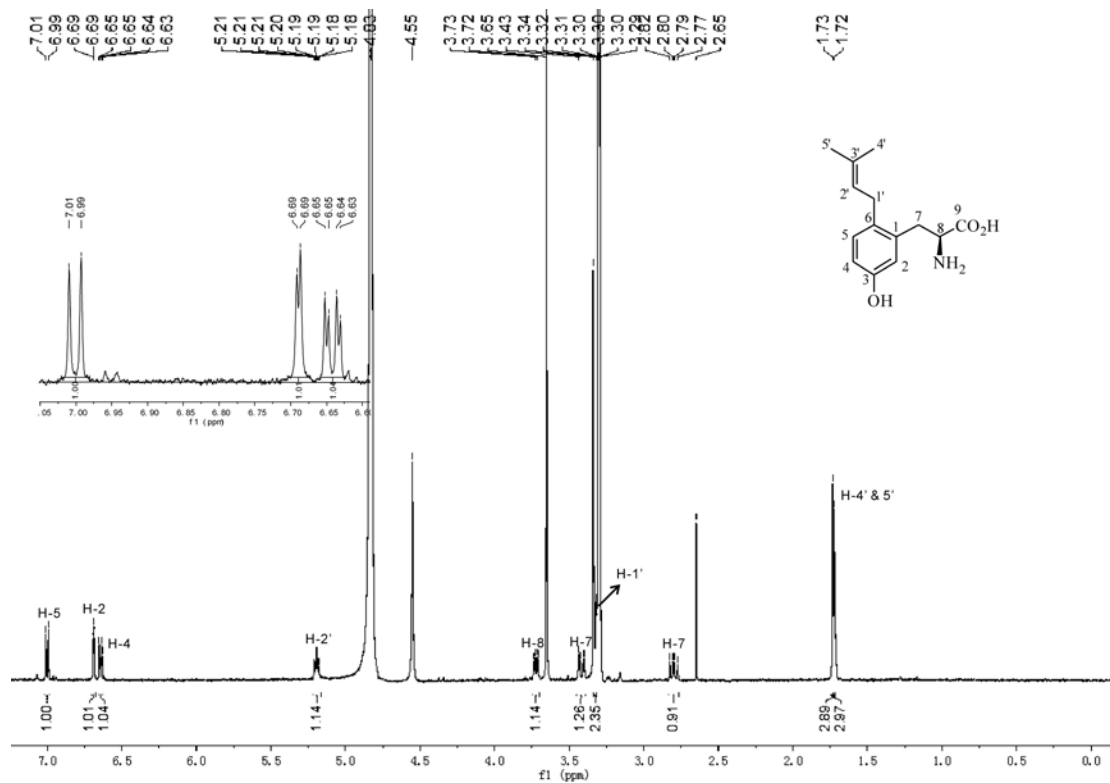

Fig. S2. <sup>1</sup>H-NMR spectrum of **4b** in MeOH-d<sub>4</sub>.

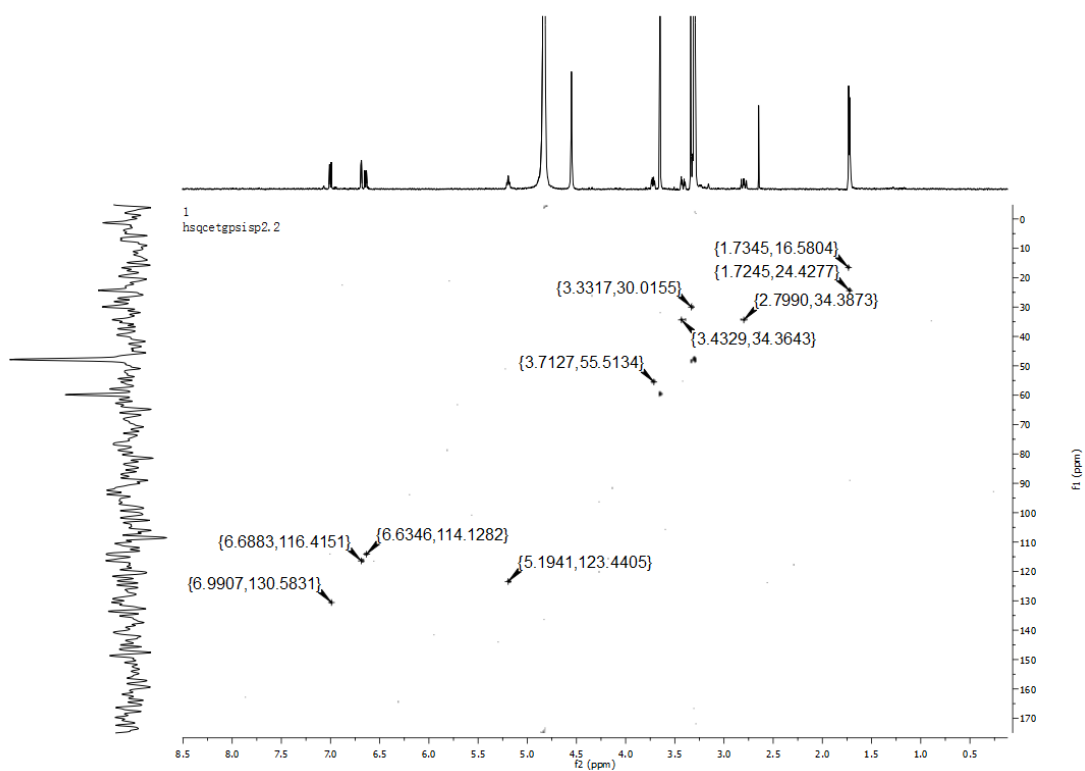

Fig. S3. HSQC spectrum of **4b** in MeOH-d<sub>4</sub>.

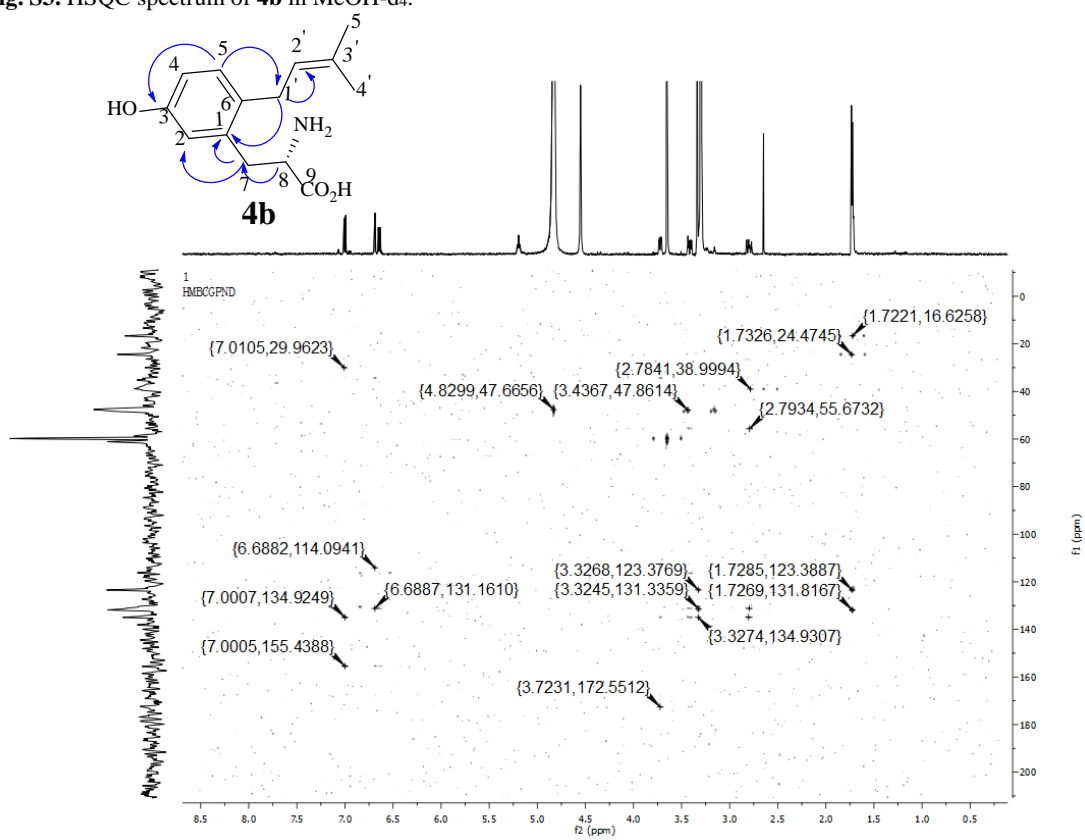

Fig. S4. HMBC spectrum of **4b** in MeOH-d<sub>4</sub>.

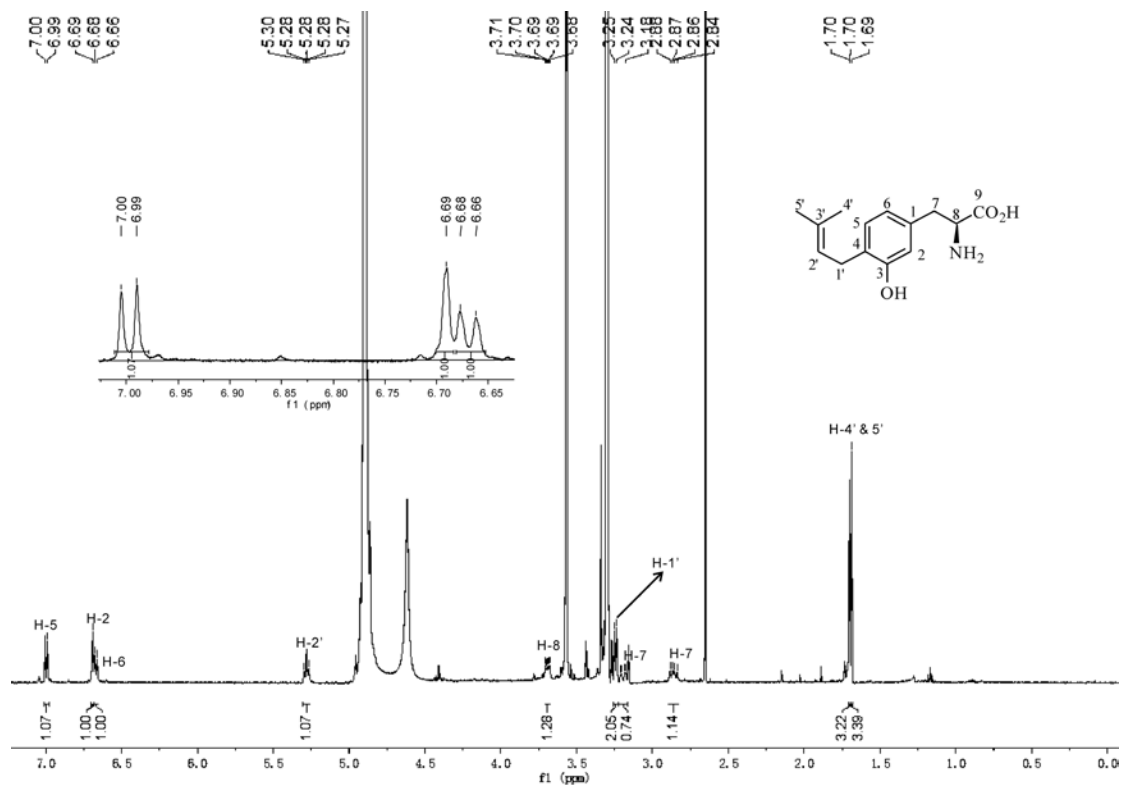

**Fig. S5.** <sup>1</sup>H-NMR spectrum of **4c** in MeOH-d<sub>4</sub>.

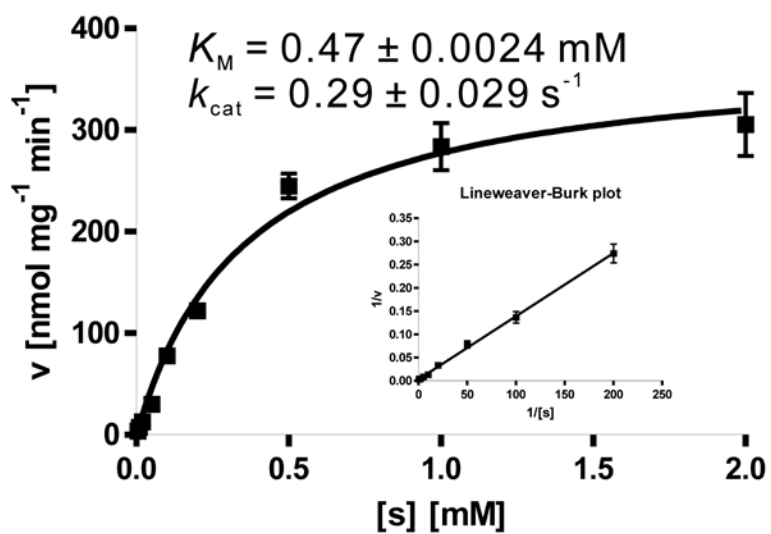

Fig. S6. Determination of kinetic parameters of FgaPT2 for 3a.

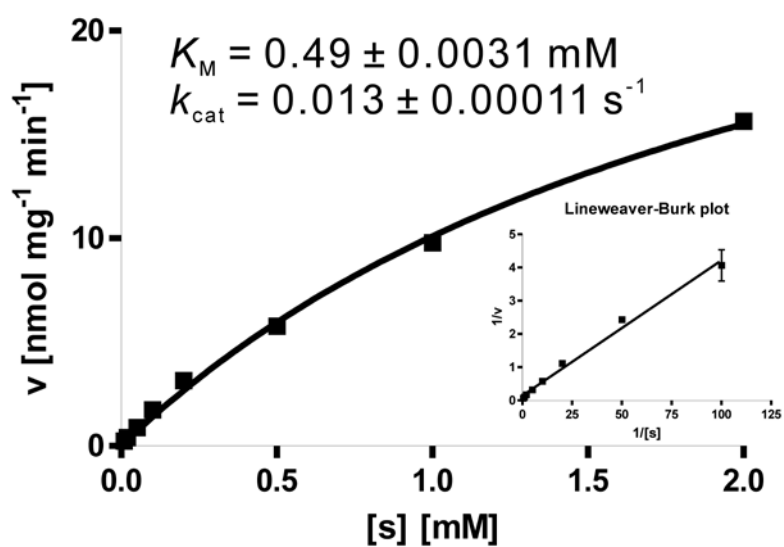

Fig. S7. Determination of kinetic parameters of 5-DMATS for 3a.

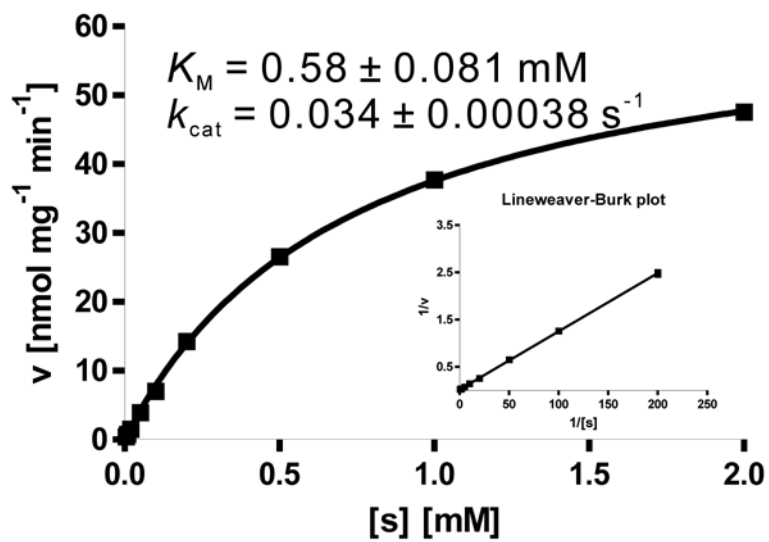

Fig. S8. Determination of kinetic parameters of 6-DMATS<sub>Sv</sub> for 3a.

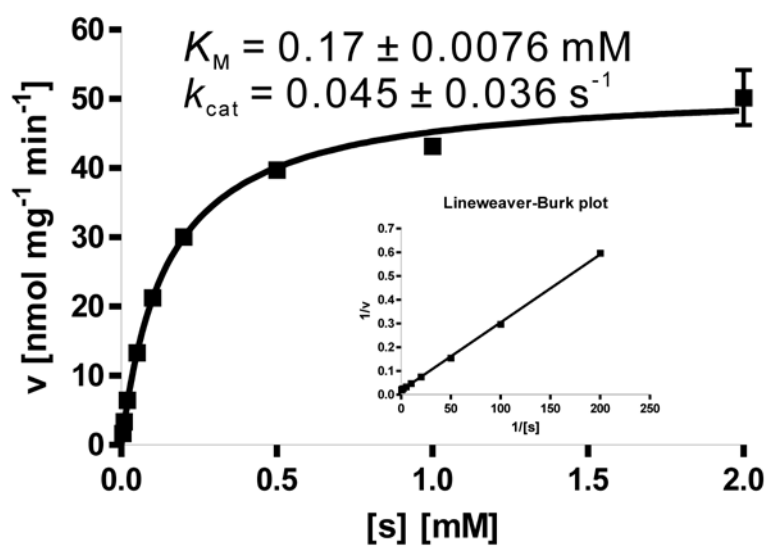

Fig. S9. Determination of kinetic parameters of 7-DMATS for 3a.

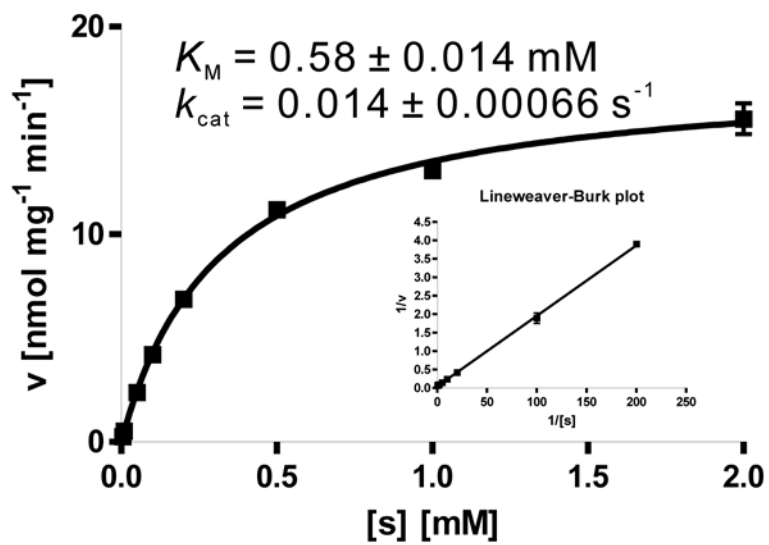

Fig. S10. Determination of kinetic parameters of TyrPT for 3a.

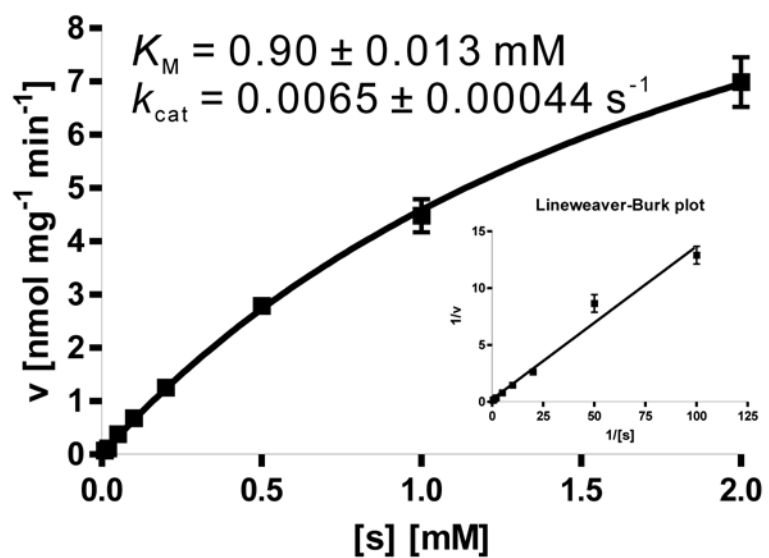

Fig. S11. Determination of kinetic parameters of FgaPT2 for 4a.
